# Supplementary material for: Synthesis and characterization of two self-catenated networks and one case of pcu topology based on the mixed ligands
Source: Royal Society of Chemistry journal article supplement (doi:10.1039/c2ce06451k), 2012-01-01
Supplement: c2ce06451k.pdf [file c2ce06451k.pdf]

# Synthesis and characterization of two self-catenated networks and one case of pcu topology based on the mixed ligands

Lian-Jie Li,<sup>a</sup> Chao Qin,<sup>\*a</sup> Xin-Long Wang,<sup>a</sup> Kui-Zhan Shao<sup>a</sup>, Zhong-Min Su<sup>\*a</sup>  
and Peng-jun Liu<sup>\*b</sup>

*Institute of Functional Material Chemistry, Faculty of Chemistry, Northeast Normal University, Changchun, 130024, People's Republic of China*

\*Corresponding author. Tel.: (+86)-431-5099108.

E-mail address: [zmsu@nenu.edu.cn](mailto:zmsu@nenu.edu.cn)

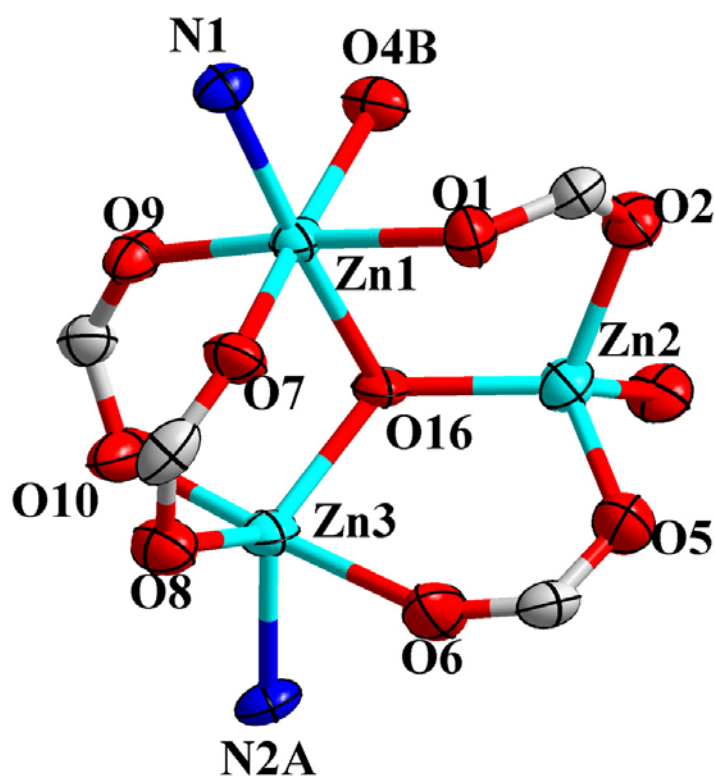

**Fig. S1** Coordination environment of Zn<sup>II</sup> in **1** with the ellipsoids drawn at the 30% probability level, with hydrogen atoms were omitted for clarity (Symmetry transformations used to generate equivalent atoms: A,  $x, y, 1 + z$ ; B,  $1 - x, 1 - y, 2 - z$ ).

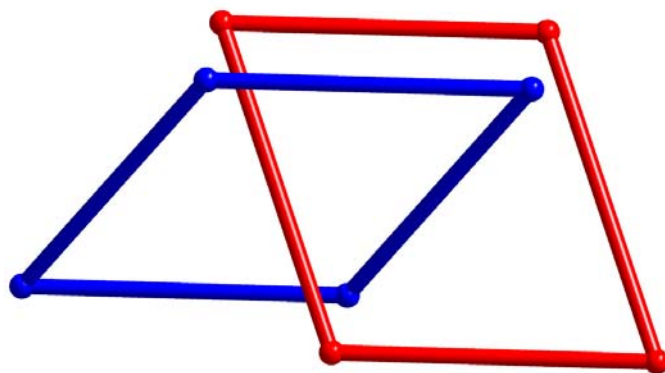

**Fig. S2** Schematic representation of the (4,8)-connected net for **1**: the shortest four-membered rings are interlocked.

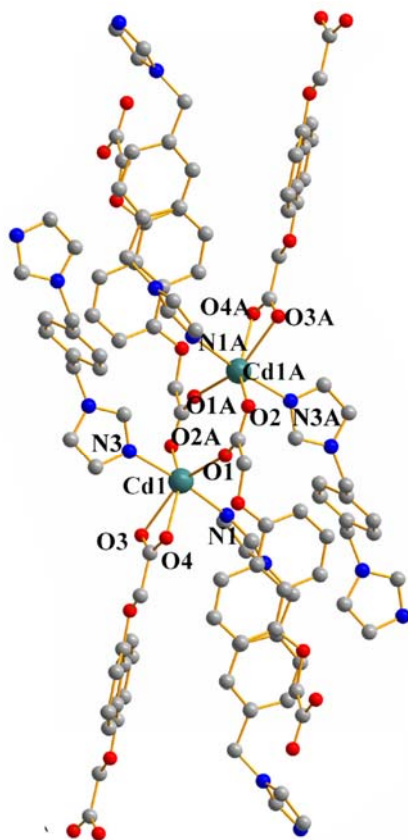

**Fig. S3** Coordination environment of Cd<sup>II</sup> in **2**, with hydrogen atoms were omitted for clarity (Symmetry transformations used to generate equivalent atoms: A,  $1 - x, -y, 2 - z$ ).

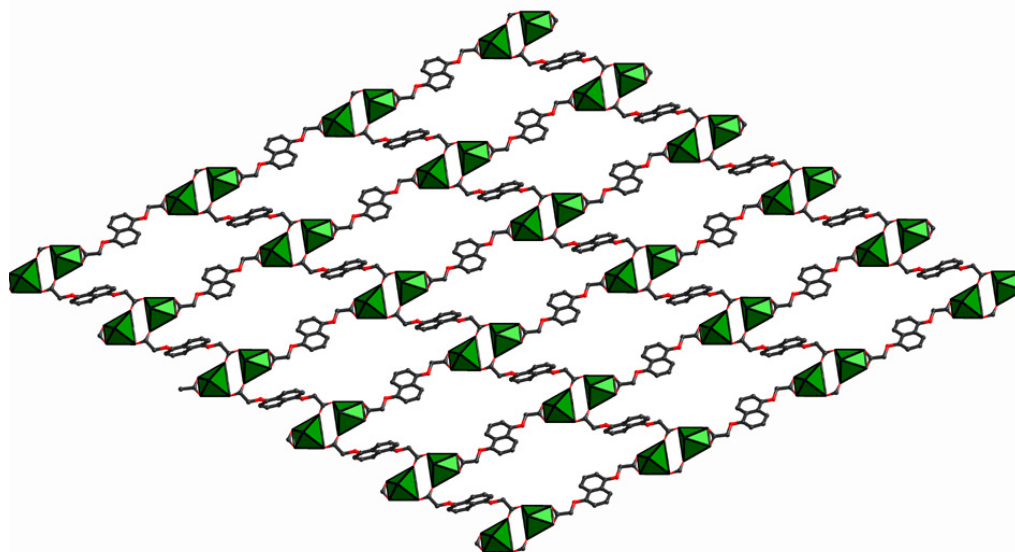

**Fig. S4** Schematic view of the 2D structure is connected by **ndd** ligands for **2**.

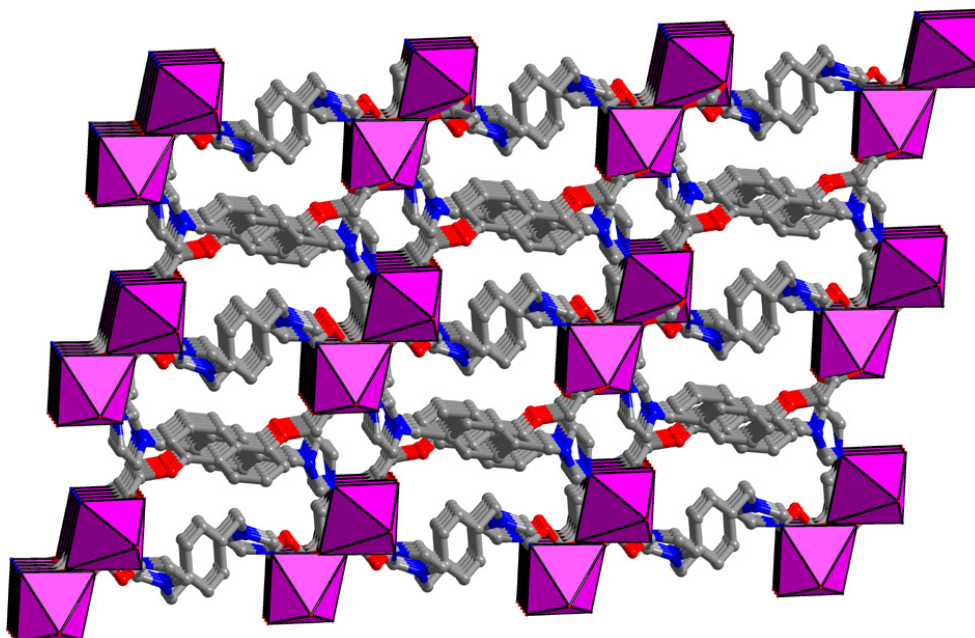

**Fig. S5** Schematic view of the 3D structure is connected by **ndd** and **BIMB** ligands for **2**.

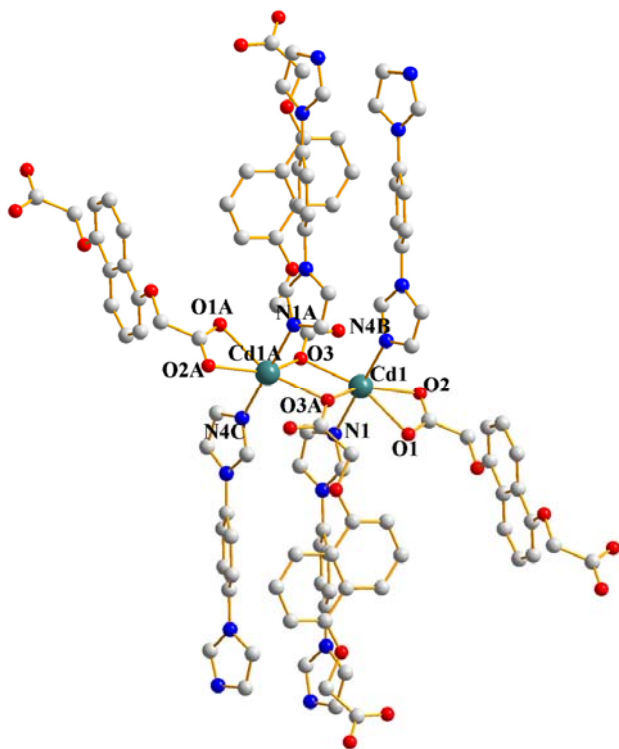

**Fig. S6** Coordination environment of Cd<sup>II</sup> in **3**, with hydrogen atoms were omitted for clarity (Symmetry transformations used to generate equivalent atoms: A,  $-x, 1 - y, 1 - z$ ; B,  $-1 + x, -1 + y, -1 + z$ ; C,  $1 - x, 2 - y, 2 - z$ ).

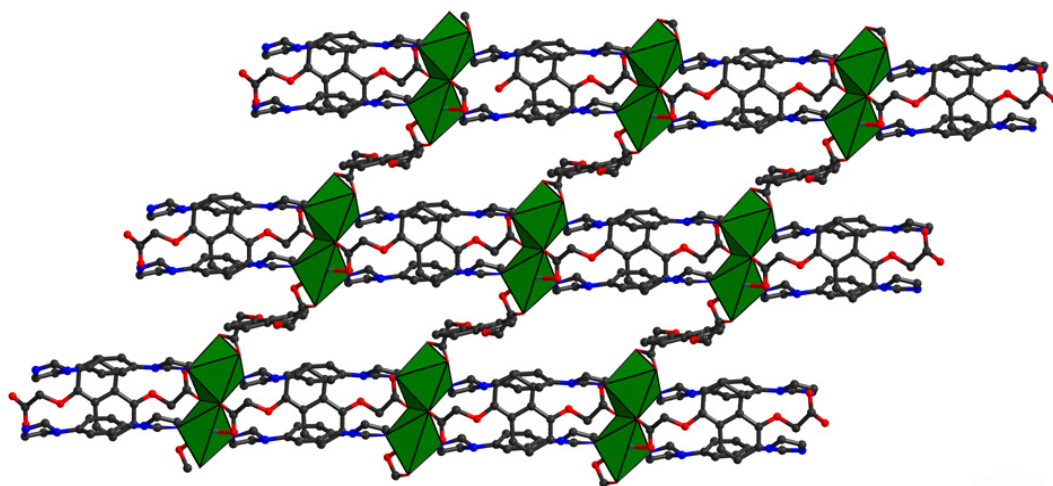

**Fig. S7** Schematic view of the 3D structure is connected by **BIMB** and **ndd** ligands for **3**.

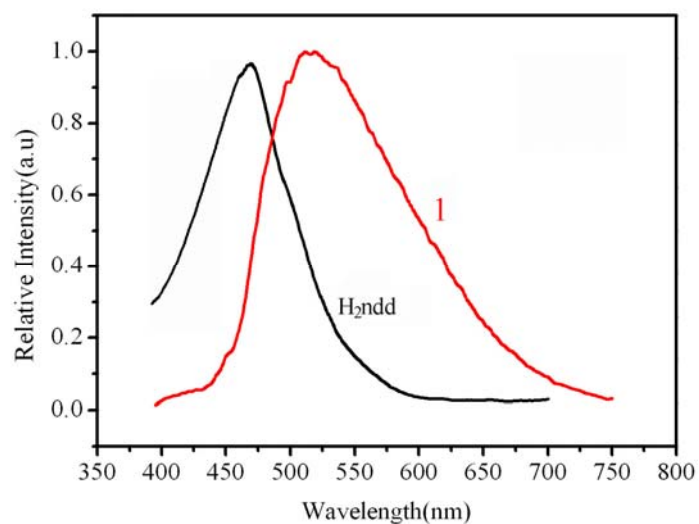

**Fig. S8** Emission spectra of compound **1** and **H<sub>2</sub>ndd** in the solid state at room temperature.

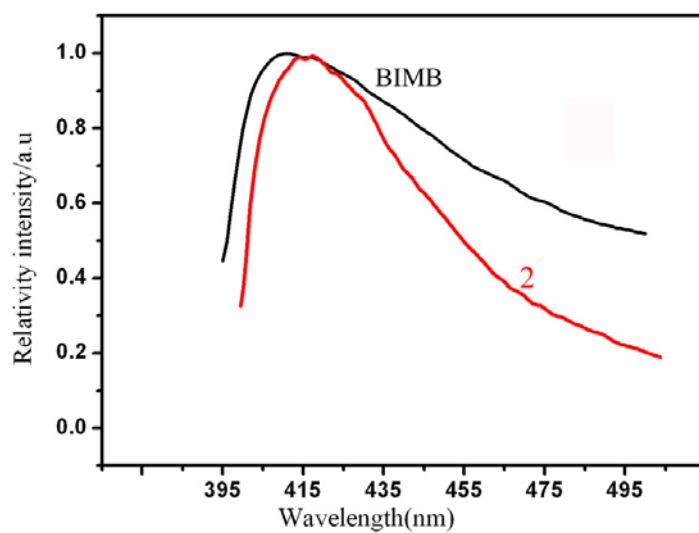

**Fig. S9** Emission spectra of compound **2** and **BIMB** in the solid state at room temperature.

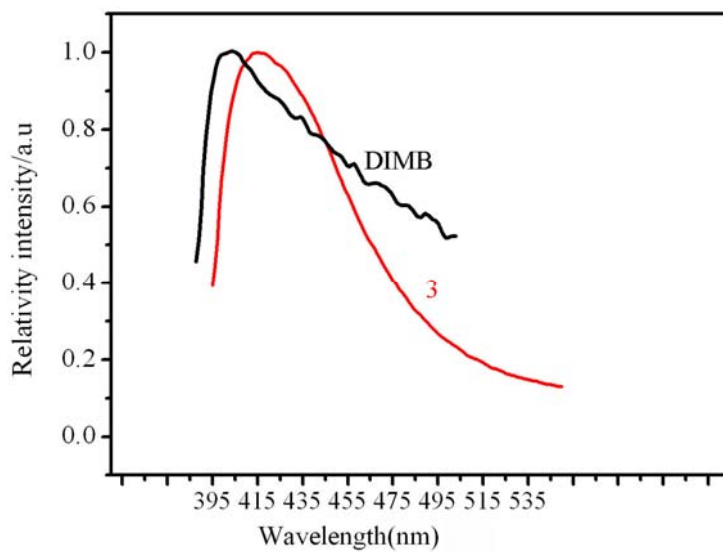

**Fig. S10** Emission spectra of compound **3** and **DIMB** in the solid state at room temperature.

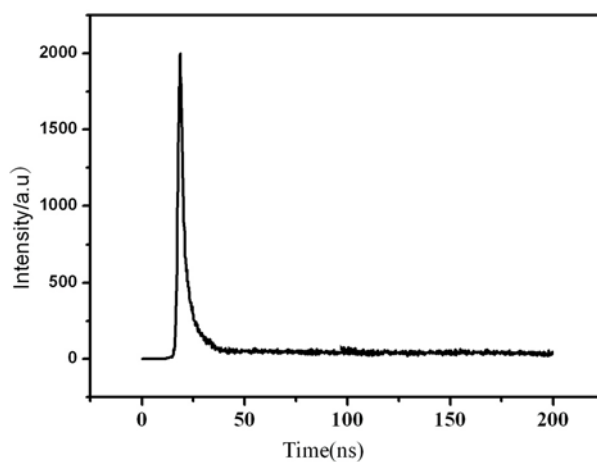

**Fig. S11** Fitted decay curve monitored at 507 nm for compound **1**.

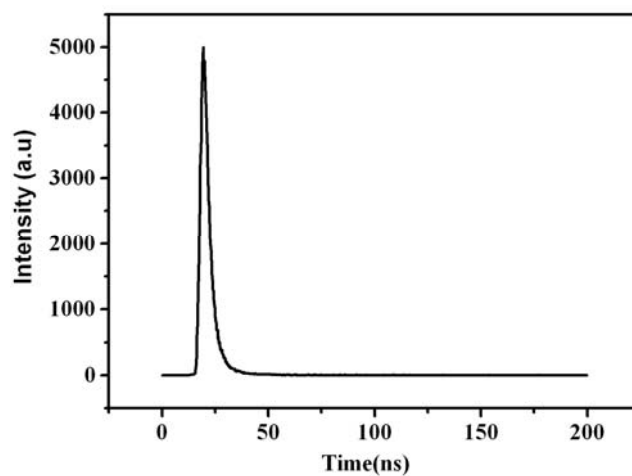

**Fig. S12** Fitted decay curve monitored at 425 nm for compound **2**.

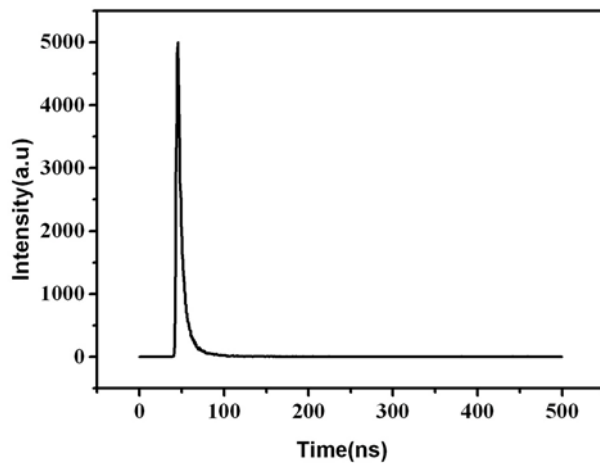

**Fig. S13** Fitted decay curve monitored at 427 nm for compound **3**.

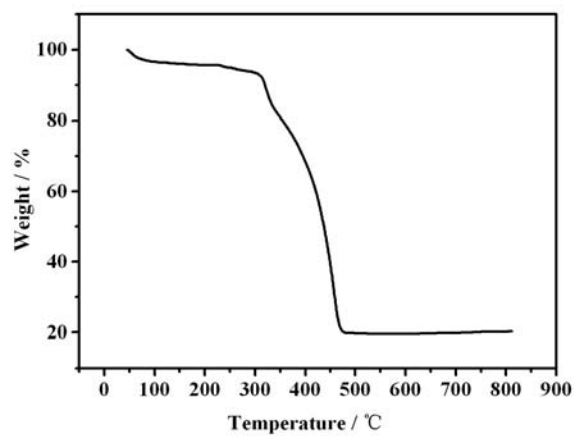

**Fig. S14** The TG curves of **1**.

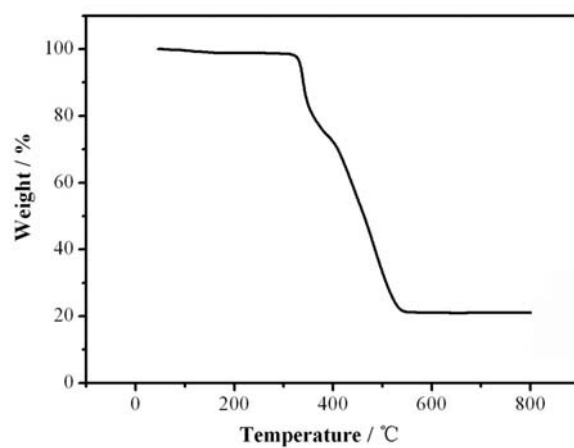

**Fig. S15** The TG curves of **2**.

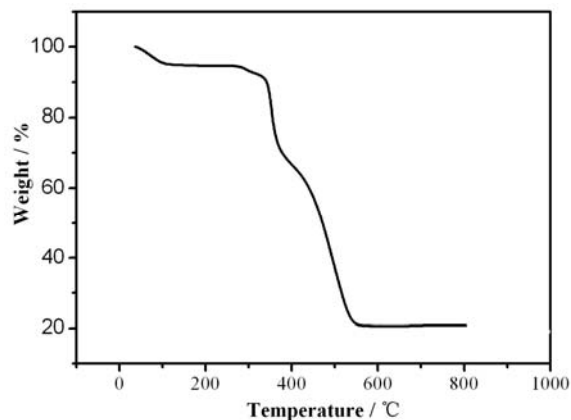

**Fig. S16** The TG curves of **3**.

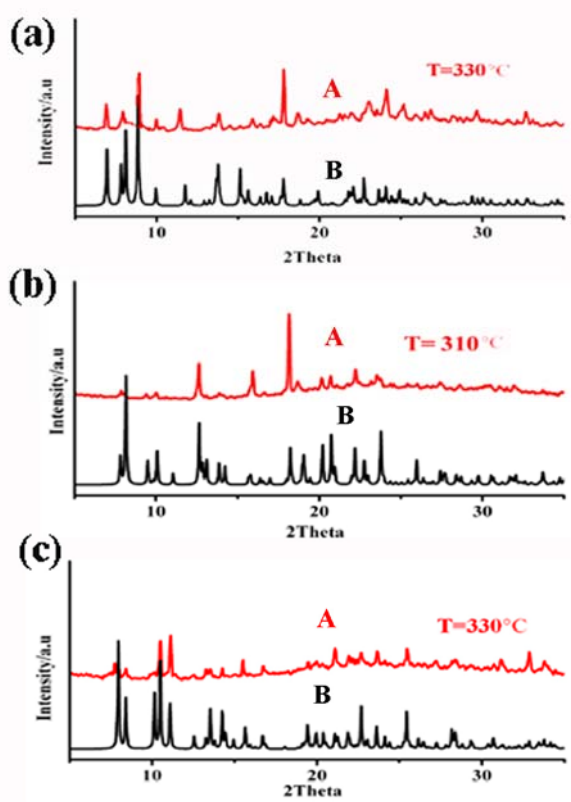

**Fig. 17** (a) Simulated and experimental PXRD spectra of **1**: A as-synthesized ( $T = 330^{\circ}\text{C}$ ); B simulated. (b) Simulated and experimental PXRD spectra of **2**: A as-synthesized ( $T = 310^{\circ}\text{C}$ ); B simulated. (c) Simulated and experimental PXRD spectra of **3**: A as-synthesized ( $T = 330^{\circ}\text{C}$ ); B simulated.



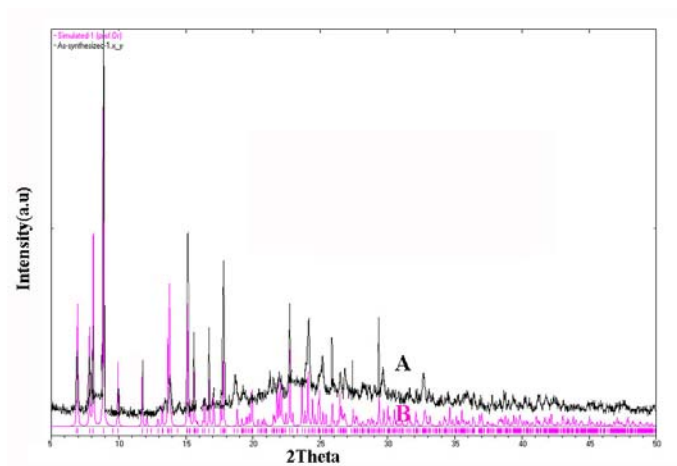

**Fig. S18** Schematic representation of the simulated and experimental PXRD spectra of **1**: (A as-synthesized; B simulated.).

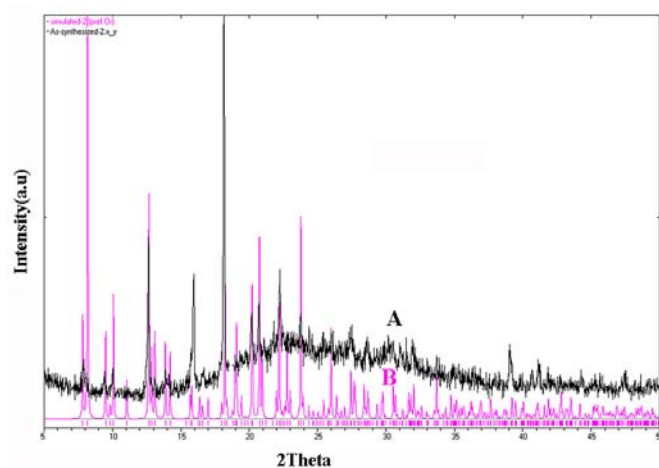

**Fig. S19** Schematic representation of the simulated and experimental PXRD spectra of **2**: (A as-synthesized; B simulated.).

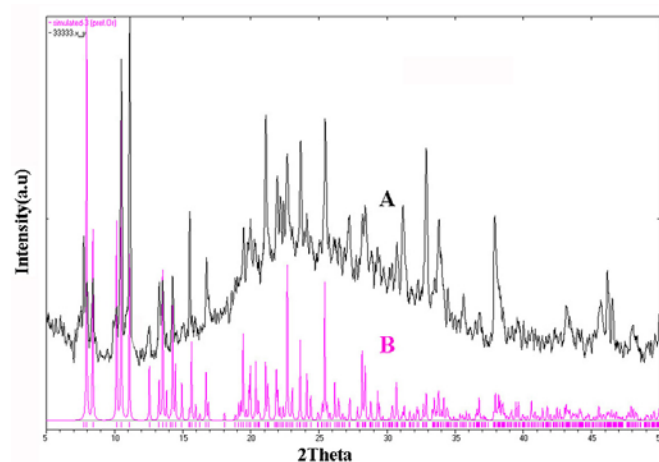

**Fig. S20** Schematic representation of the simulated and experimental PXRD spectra of **3**: (A as-synthesized; B simulated.).

**Table S1** Crystal data and structure refinements for complexes **1-3**.

| Complex                                                                                                       | <b>1</b>                                                                       | <b>2</b>                                                        | <b>3</b>                                                         |
|---------------------------------------------------------------------------------------------------------------|--------------------------------------------------------------------------------|-----------------------------------------------------------------|------------------------------------------------------------------|
| Formula                                                                                                       | C <sub>45</sub> H <sub>38</sub> N <sub>2</sub> O <sub>17</sub> Zn <sub>3</sub> | C <sub>28</sub> H <sub>24</sub> CdN <sub>4</sub> O <sub>6</sub> | C <sub>26</sub> H <sub>24</sub> N <sub>4</sub> O <sub>8</sub> Cd |
| Formula weight                                                                                                | 1090.91                                                                        | 624.92                                                          | 632.87                                                           |
| Crystal system                                                                                                | Triclinic                                                                      | Triclinic                                                       | Triclinic                                                        |
| Space group                                                                                                   | <i>P</i> $\bar{1}$                                                             | <i>P</i> $\bar{1}$                                              | <i>P</i> $\bar{1}$                                               |
| <i>a</i> /Å                                                                                                   | 13.006(13)                                                                     | 10.005(2)                                                       | 9.361(19)                                                        |
| <i>b</i> /Å                                                                                                   | 13.637(14)                                                                     | 11.303(3)                                                       | 12.713(19)                                                       |
| <i>c</i> /Å                                                                                                   | 14.104(15)                                                                     | 12.206(3)                                                       | 12.755(3)                                                        |
| $\alpha$ /°                                                                                                   | 79.971(17)                                                                     | 100.797(3)                                                      | 111.843(2)                                                       |
| $\beta$ /°                                                                                                    | 64.389(15)                                                                     | 107.308(4)                                                      | 105.938(2)                                                       |
| $\gamma$ /°                                                                                                   | 71.276(15)                                                                     | 98.944(4)                                                       | 97.104(2)                                                        |
| <i>V</i> /Å <sup>3</sup>                                                                                      | 2134.5(4)                                                                      | 1261.3(5)                                                       | 1310.7(4)                                                        |
| <i>Z</i>                                                                                                      | 2                                                                              | 2                                                               | 2                                                                |
| <i>D</i> <sub>calcd.</sub> [g cm <sup>-3</sup> ]                                                              | 1.690                                                                          | 1.646                                                           | 1.593                                                            |
| $\mu$ /mm <sup>-1</sup>                                                                                       | 1.756                                                                          | 0.918                                                           | 0.890                                                            |
| <i>F</i> (000)                                                                                                | 1102.0                                                                         | 632.0                                                           | 632.0                                                            |
| reflection/unique                                                                                             | 10810/7380                                                                     | 7467/5506                                                       | 6646/4520                                                        |
| <i>R</i> <sub>int</sub>                                                                                       | 0.0448                                                                         | 0.0245                                                          | 0.0502                                                           |
| GOF on <i>F</i> <sup>2</sup>                                                                                  | 1.065                                                                          | 1.002                                                           | 1.007                                                            |
| <i>R</i> <sub>1</sub> <sup>a</sup> , <i>wR</i> <sub>2</sub> <sup>b</sup> [ <i>I</i> >2 $\sigma$ ( <i>I</i> )] | 0.0629, 0.1260                                                                 | 0.0558, 0.1265                                                  | 0.0611, 0.0947                                                   |
| <i>R</i> <sub>1</sub> , <i>wR</i> <sub>2</sub> (all data)                                                     | 0.1262, 0.1682                                                                 | 0.0864, 0.1411                                                  | 0.1223, 0.1074                                                   |

**Table S2** Selected bond lengths (Å) and angles (°) for complexes **1-3**<sup>a</sup>

| Complex <b>1</b> |          |                  |          |
|------------------|----------|------------------|----------|
| Zn(1)-O(1)       | 2.148(5) | Zn(2)-O(2)       | 1.987(5) |
| Zn(2)-O(3)       | 1.970(5) | Zn(1)-O(4)B      | 2.088(5) |
| Zn(2)-O(5)       | 1.964(6) | Zn(3)-O(6)       | 2.249(6) |
| Zn(1)-O(7)       | 2.071(5) | Zn(3)-O(8)       | 1.975(5) |
| Zn(1)-O(9)       | 2.055(5) | Zn(3)-O(10)      | 2.088(5) |
| Zn(2)-O(16)      | 1.966(5) | Zn(3)-O(16)      | 1.995(5) |
| Zn(1)-O(16)      | 2.202(5) | Zn(1)-O(4)B      | 2.088(5) |
| Zn(3)-N(2)A      | 2.030(6) | O(9)-Zn(1)-N(1)  | 92.7(2)  |
| O(9)-Zn(1)-O(4)B | 93.1(2)  | N(1)-Zn(1)-O(4)B | 86.7(2)  |
| O(9)-Zn(1)-O(7)  | 95.5(2)  | N(1)-Zn(1)-O(7)  | 87.9(2)  |
| O(4)B-Zn(1)-O(7) | 170.0(2) | O(9)-Zn(1)-O(1)  | 175.6(2) |
| N(1)-Zn(1)-O(1)  | 91.6(2)  | O(4)B-Zn(1)-O(1) | 88.2(2)  |

|                   |            |                   |            |
|-------------------|------------|-------------------|------------|
| O(7)-Zn(1)-O(1)   | 83.6(2)    | O(9)-Zn(1)-O(16)  | 87.25(19)  |
| N(1)-Zn(1)-O(16)  | 174.4(2)   | O(4)B-Zn(1)-O(16) | 87.71(19)  |
| O(7)-Zn(1)-O(16)  | 97.8(2)    | O(1)-Zn(1)-O(16)  | 88.61(19)  |
| O(5)-Zn(2)-O(16)  | 111.8(2)   | O(5)-Zn(2)-O(3)   | 109.1(2)   |
| O(16)-Zn(2)-O(3)  | 112.3(2)   | O(5)-Zn(2)-O(2)   | 109.0(3)   |
| O(16)-Zn(2)-O(2)  | 113.8(2)   | O(3)-Zn(2)-O(2)   | 113.8(2)   |
| O(8)-Zn(3)-O(16)  | 125.6(2)   | O(8)-Zn(3)-N(2)A  | 109.6(3)   |
| O(16)-Zn(3)-N(2)A | 124.1(2)   | O(8)-Zn(3)-O(10)  | 94.6(2)    |
| O(16)-Zn(3)-O(10) | 90.0(2)    | N(2)A-Zn(3)-O(10) | 94.2(2)    |
| O(8)-Zn(3)-O(6)   | 89.2(2)    | O(16)-Zn(3)-O(6)  | 86.7(2)    |
| N(2)A-Zn(3)-O(6)  | 85.7(2)    | O(10)-Zn(3)-O(6)  | 176.0(2)   |
| <b>Complex 2</b>  |            |                   |            |
| Cd(1)-N(3)        | 2.276(4)   | Cd(1)-O(1)        | 2.305(4)   |
| Cd(1)-N(1)        | 2.314(4)   | Cd(1)-O(2)A       | 2.317(4)   |
| Cd(1)-O(4)        | 2.370(4)   | Cd(1)-O(3)        | 2.463(4)   |
| N(3)-Cd(1)-O(1)   | 94.29(17)  | N(3)-Cd(1)-N(1)   | 171.87(16) |
| O(1)-Cd(1)-N(1)   | 93.83(18)  | N(3)-Cd(1)-O(2)A  | 89.96(15)  |
| O(1)-Cd(1)-O(2)A  | 114.58(18) | N(1)-Cd(1)-O(2)A  | 86.87(16)  |
| N(3)-Cd(1)-O(4)   | 90.28(15)  | O(1)-Cd(1)-O(4)   | 98.48(16)  |
| O(2)A-Cd(1)-O(4)  | 88.30(16)  | N(3)-Cd(1)-O(3)   | 93.32(15)  |
| O(1)-Cd(1)-O(3)   | 151.35(17) | N(1)-Cd(1)-O(3)   | 79.33(17)  |
| O(2)A-Cd(1)-O(3)  | 92.98(16)  | O(4)-Cd(1)-O(3)   | 79.39(16)  |
| <b>Complex 3</b>  |            |                   |            |
| Cd(1)-N(4)B       | 2.267(6)   | Cd(1)-N(1)        | 2.283(6)   |
| Cd(1)-O(2)        | 2.350(5)   | Cd(1)-O(3)        | 2.383(5)   |
| Cd(1)-O(3)A       | 2.366(5)   | Cd(1)-O(1)        | 2.500(5)   |
| N(4)B-Cd(1)       | 2.267(6)   | O(3)A-Cd(1)       | 2.651(5)   |
| N(4)B-Cd(1)-O(2)  | 87.0(2)    | N(1)-Cd(1)-O(2)   | 94.34(19)  |
| O(2)-Cd(1)-O(3)   | 146.23(17) | N(4)B-Cd(1)-O(3)A | 84.0(2)    |
| N(1)-Cd(1)-O(3)A  | 93.36(19)  | O(2)-Cd(1)-O(3)A  | 141.06(16) |
| O(3)-Cd(1)-O(3)A  | 72.51(18)  | N(4)B-Cd(1)-O(1)  | 95.31(19)  |

---

|                  |            |                  |            |
|------------------|------------|------------------|------------|
| N(1)-Cd(1)-O(1)  | 83.38(18)  | O(2)-Cd(1)-O(1)  | 53.71(15)  |
| O(3)-Cd(1)-O(1)  | 157.87(16) | O(3)A-Cd(1)-O(1) | 89.52(16)  |
| N(4)B-Cd(1)-O(4) | 83.9(2)    | N(1)-Cd(1)-O(4)  | 98.53(19)  |
| O(2)-Cd(1)-O(4)  | 96.72(17)  | O(3)-Cd(1)-O(4)  | 50.39(16)  |
| O(3)A-Cd(1)-O(4) | 119.73(17) | O(1)-Cd(1)-O(4)  | 150.35(17) |

---

<sup>a</sup>Symmetry transformations used to generate equivalent atoms: for **1**: A,  $x, y, 1 + z$ ; B,  $1 - x, 1 - y, 2 - z$ . for **2**: A,  $1 - x, -y, 2 - z$ , for **3**: A,  $-x, 1 - y, 1 - z$ ; B,  $-1 + x, -1 + y, -1 + z$ .
